# Supplementary material for: A New Perspective in Rotation Correction; 3D Analysis During FEM
Source: Research Square preprint supplement (doi:10.21203/rs.3.rs-8725262/v1), 2026-02-12
Supplement: Supplementary file 1 [file cb0cb08a4808561d6d576d36.xlsx]

## Sheet: Sheet1
	triangluar cross section for the root
	L= Long root
	s= Short root
	U= normal root form
	V= V shape root form
	Thin= a larger lab-ling dimension for the root
			Force application
			Distal Labial	Mesial Lingual
			Triangle L	U-shaped L	conical L	elipsoid L
		Distal	-2.0781e-05	1.0529e-06	-2.3011e-05	-1.5641e-07
				8.041e-07	-2.0193e-05
			-1.6707e-05	7.2745e-07	-1.9247e-05	-6.5213e-08
			-1.5683e-05	6.5048e-07	-1.8302e-05	-3.6749e-08
			-1.4656e-05	5.7167e-07	-1.7358e-05	-8.8833e-09
			-1.3631e-05	4.9122e-07	-1.6416e-05	1.7359e-08
			-1.2606e-05	4.0741e-07	-1.5478e-05	4.208e-08
		10	-1.158e-05	3.2354e-07	-1.4536e-05	6.7411e-08
			-1.0553e-05	2.3951e-07	-1.3597e-05	9.0315e-08
			-9.5263e-06	1.564e-07	-1.2658e-05	1.1301e-07
			-8.4984e-06	7.4089e-08	-1.1718e-05	1.358e-07
			-7.4687e-06	-8.1825e-09	-1.0778e-05	1.5854e-07
			-6.4362e-06	-8.965e-08	-9.8352e-06	1.8135e-07
			-5.4009e-06	-1.703e-07	-8.8924e-06	2.0764e-07
			-4.3633e-06	-2.5034e-07	-7.9489e-06	2.3311e-07
			-3.3242e-06	-3.2844e-07	-7.0052e-06	2.5775e-07
			-2.2839e-06	-4.0662e-07	-6.0604e-06	2.8307e-07
		20	-1.2419e-06	-4.837e-07	-5.1147e-06	3.1001e-07
			-1.9848e-07	-5.6061e-07	-4.1686e-06	3.3745e-07
			8.4635e-07	-6.3694e-07	-3.222e-06	3.6549e-07
			1.8921e-06	-7.1308e-07	-2.2752e-06	3.9332e-07
			2.9382e-06	-7.8915e-07	-1.3279e-06	4.2075e-07
			3.9847e-06	-8.6538e-07	-3.808e-07	4.4833e-07
			5.0312e-06	-9.4149e-07	5.6661e-07	4.7591e-07
			6.0777e-06	-1.0175e-06	1.5136e-06	5.0315e-07
			7.1229e-06	-1.0932e-06	2.4602e-06	5.3013e-07
			8.1679e-06	-1.1695e-06	3.4064e-06	5.5673e-07
		30	9.2116e-06	-1.2465e-06	4.3522e-06	5.8303e-07
			1.0254e-05	-1.3242e-06	5.2976e-06	6.0909e-07
			1.1295e-05	-1.4021e-06	6.2425e-06	6.3367e-07
			1.2334e-05	-1.4808e-06	7.1873e-06	6.5675e-07
			1.337e-05	-1.5603e-06	8.1311e-06	6.7854e-07
			1.4405e-05	-1.6409e-06	9.073e-06	6.988e-07
			1.5438e-05	-1.7226e-06	1.0014e-05	7.1968e-07
			1.6467e-05	-1.8052e-06	1.0955e-05	7.4094e-07
			1.7495e-05	-1.8879e-06	1.1894e-05	7.6152e-07
			1.8522e-05	-1.9723e-06	1.2836e-05	7.8158e-07
		40	1.9547e-05	-2.0549e-06	1.3777e-05	8.0051e-07
			2.0572e-05	-2.1363e-06	1.4716e-05	8.1886e-07
			2.1598e-05	-2.2171e-06	1.5656e-05	8.4186e-07
			2.2624e-05	-2.2964e-06	1.6599e-05	8.7022e-07
			2.3651e-05	-2.3741e-06	1.7545e-05	8.9826e-07
			2.4678e-05	-2.4539e-06	1.8491e-05	9.2439e-07
				-2.5328e-06	1.9434e-05
		Mesial	2.876e-05	-2.7854e-06	2.2248e-05	1.014e-06
			Triangle S	U-shaped S	conical S	ellipsoid S
			-3.2902e-05	-1.511e-06	-3.843e-05	-2.1072e-07
				-1.8309e-06	-3.4159e-05
		Distal	-2.6384e-05	-1.9335e-06	-3.2729e-05	-3.7379e-07
			-2.4744e-05	-2.0369e-06	-3.1303e-05	-4.0884e-07
			-2.3106e-05	-2.1394e-06	-2.9873e-05	-4.4487e-07
			-2.1471e-05	-2.2454e-06	-2.8444e-05	-4.8226e-07
			-1.9839e-05	-2.3542e-06	-2.7018e-05	-5.2223e-07
			-1.8203e-05	-2.4594e-06	-2.5595e-05	-5.6156e-07
			-1.6565e-05	-2.5646e-06	-2.4171e-05	-6.0115e-07
			-1.4925e-05	-2.6719e-06	-2.2747e-05	-6.429e-07
			-1.3285e-05	-2.7789e-06	-2.1323e-05	-6.8534e-07
		10	-1.1644e-05	-2.8851e-06	-1.9897e-05	-7.2729e-07
			-1e-05	-2.9904e-06	-1.8471e-05	-7.6774e-07
			-8.354e-06	-3.0948e-06	-1.7044e-05	-8.0699e-07
			-6.7048e-06	-3.1984e-06	-1.5617e-05	-8.4501e-07
			-5.0543e-06	-3.3004e-06	-1.4189e-05	-8.8329e-07
			-3.4022e-06	-3.4024e-06	-1.2759e-05	-9.216e-07
			-1.7485e-06	-3.5039e-06	-1.1329e-05	-9.592e-07
			-9.3479e-08	-3.6047e-06	-9.8985e-06	-9.9606e-07
			1.5625e-06	-3.7051e-06	-8.4675e-06	-1.0325e-06
			3.2193e-06	-3.8055e-06	-7.0359e-06	-1.0686e-06
		20	4.8774e-06	-3.9055e-06	-5.6042e-06	-1.1053e-06
			6.5353e-06	-4.0054e-06	-4.1727e-06	-1.1417e-06
			8.1932e-06	-4.1053e-06	-2.7413e-06	-1.1785e-06
			9.8511e-06	-4.2053e-06	-1.3101e-06	-1.2154e-06
			1.1509e-05	-4.3052e-06	1.2133e-07	-1.2527e-06
			1.3165e-05	-4.406e-06	1.5523e-06	-1.2895e-06
			1.482e-05	-4.507e-06	2.9828e-06	-1.3274e-06
			1.6474e-05	-4.6083e-06	4.4127e-06	-1.366e-06
			1.8126e-05	-4.7107e-06	5.8421e-06	-1.4062e-06
			1.9776e-05	-4.8131e-06	7.2713e-06	-1.4474e-06
		30	2.1425e-05	-4.9169e-06	8.699e-06	-1.4896e-06
			2.3071e-05	-5.0213e-06	1.0125e-05	-1.5328e-06
			2.4714e-05	-5.1265e-06	1.155e-05	-1.5767e-06
			2.6354e-05	-5.233e-06	1.2974e-05	-1.6203e-06
			2.7994e-05	-5.3413e-06	1.4399e-05	-1.6647e-06
			2.9632e-05	-5.4466e-06	1.5824e-05	-1.7091e-06
			3.1272e-05	-5.5515e-06	1.7248e-05	-1.7529e-06
			3.2907e-05	-5.6578e-06	1.8673e-05	-1.795e-06
			3.4544e-05	-5.7633e-06	2.0099e-05	-1.8352e-06
			3.6185e-05	-5.8679e-06	2.1526e-05	-1.8747e-06
		40	3.7823e-05	-5.9711e-06	2.2957e-05	-1.9134e-06
			3.9461e-05	-6.0754e-06	2.4387e-05	-1.9515e-06
				-6.1778e-06	2.5814e-05
			4.5981e-05	-6.5055e-06	3.0083e-05	-2.1191e-06
		Mesial
			Triangle L	Triangle S	U form L	U From S	conical L	conical S	ellipsoid L	ellipsoid S
		1	-2.0781e-05	-3.2902e-05	1.0529e-06	-1.511e-06	-2.3011e-05	-3.843e-05	-1.5641e-07	-2.1072e-07
		49	2.876e-05	4.5981e-05	-2.7854e-06	-6.5055e-06	2.2248e-05	3.0083e-05	1.014e-06	-2.1191e-06
		Mesial	-20.4941	-32.4477	1.03836	-1.49014	-22.6933	-37.8994	-0.15425	-0.207811
		Distal	28.3629	45.3462	-2.74694	-6.41568	21.9408	29.6677	1	-2.08984
			Triangle L	Triangle S	U-Shaped L	U-shaped S	conical L	conical S	ellipsoid L	ellipsoid S
		Mesial	-20.49	-32.44	1.03	-1.49	-22.69	-37.89	-0.1542	-0.2078
		Distal	28.36	45.34	-2.74	-6.41	21.94	29.66	1	-2.0898
			PDL
			Max. SEQV
		ellipsoid L	0.0041715
		ellipsoid S	0.0049775
		Triangular L	0.0062608
		Triangular S	0.007131
		U-shaped L	0.006151
		U-shaped S	0.0071835
		conical L	0.0072575
		conical S	0.009898
